# Supplementary material
Source: PubMed Central journal article supplement (PMC6062002)
Supplement: NIHMS976734-supplement-Supplemental_Information.pdf [file NIHMS976734-supplement-Supplemental_Information.pdf]

## Supporting Information for

# **Dopamine D1-like receptor agonist and D2-like receptor antagonist (-)-Stepholidine reduces reinstatement of drug-seeking behavior for 3,4-methylenedioxypropylamphetamine (MDPV) in rats**

Callum Hicks<sup>1,2</sup>, Peng Huang<sup>1,2</sup>, Linnet Ramos<sup>1,2</sup>, Sunil U. Nayak<sup>1,2</sup>, Yohanka Caro<sup>1,2</sup>, Allen B. Reitz<sup>3</sup>, Garry R. Smith<sup>3</sup>, David Y-W. Lee<sup>4</sup>, Scott M. Rawls<sup>1,2</sup>, and Lee-Yuan Liu-Chen<sup>1,2\*</sup>

<sup>1</sup>Department of Pharmacology, Temple University School of Medicine, Philadelphia, PA

<sup>2</sup>Center for Substance Abuse Research, Temple University School of Medicine, Philadelphia, PA

<sup>3</sup>Fox Chase Chemical Diversity Center, Doylestown, PA

<sup>4</sup>Bio-Organic and Natural Products Laboratory, McLean Hospital, Harvard Medical School, Belmont, MA

Supporting Information: Figure S1

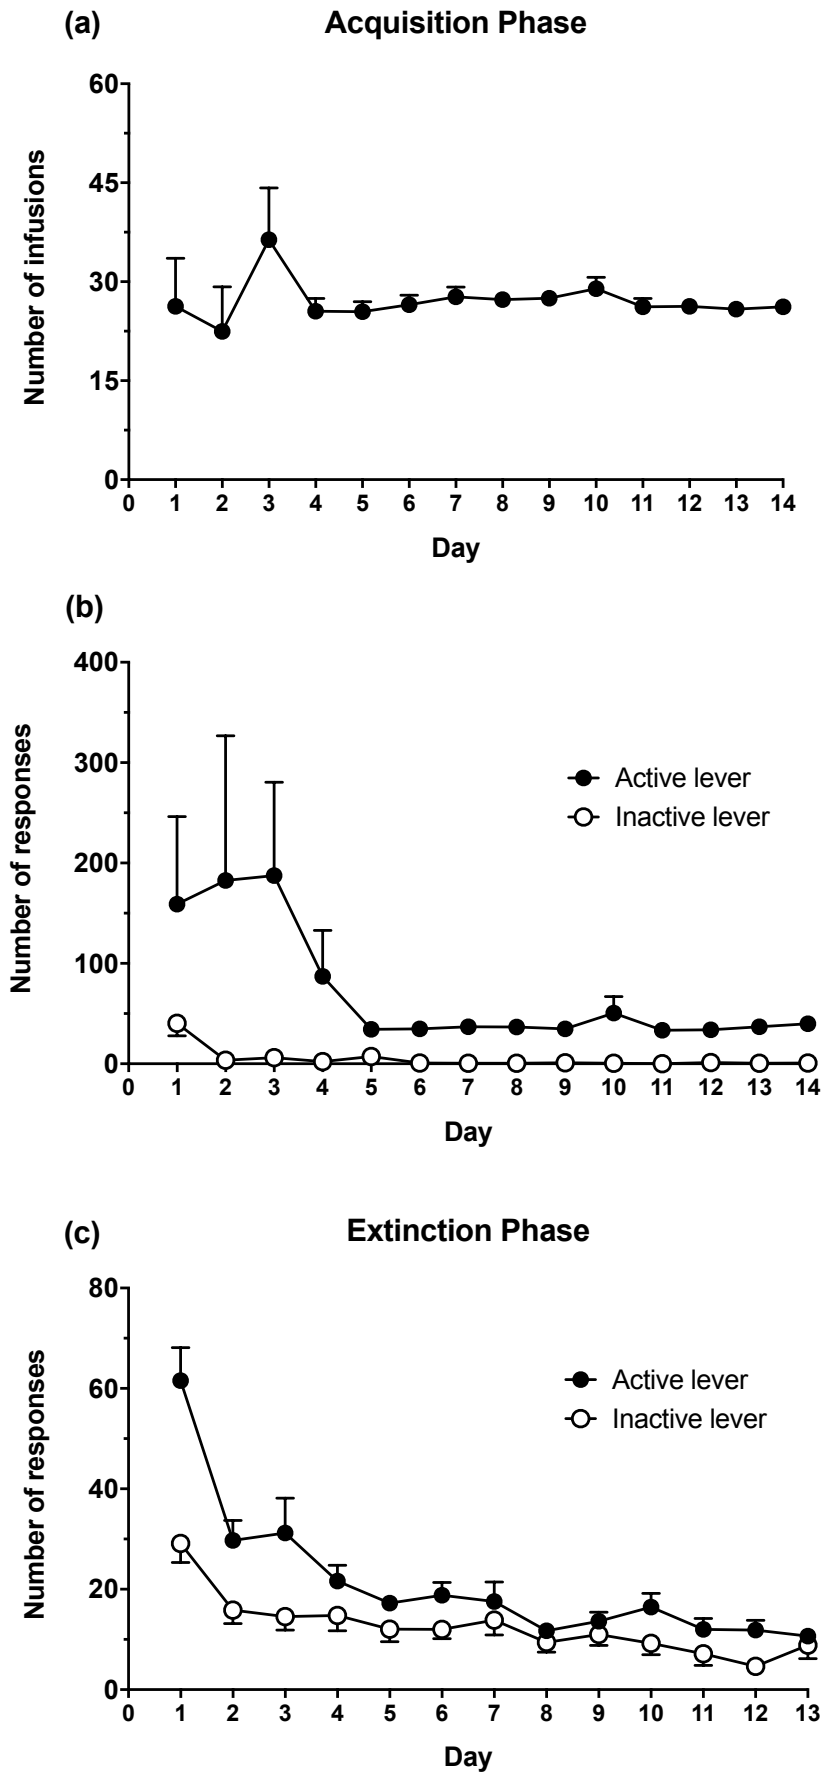

**Figure S1. MDPV self-administration performance across the acquisition and extinction phases in Experiment 1.** Number of MDPV infusions (a) and active and inactive lever responses (b) are shown across the 14 days of acquisition training. Number of active and inactive lever responses across the 13 days of extinction training (c) are also presented. Data are represented as mean  $\pm$  S.E.M. ( $n = 14$ ).

Supporting Information: Figure S2

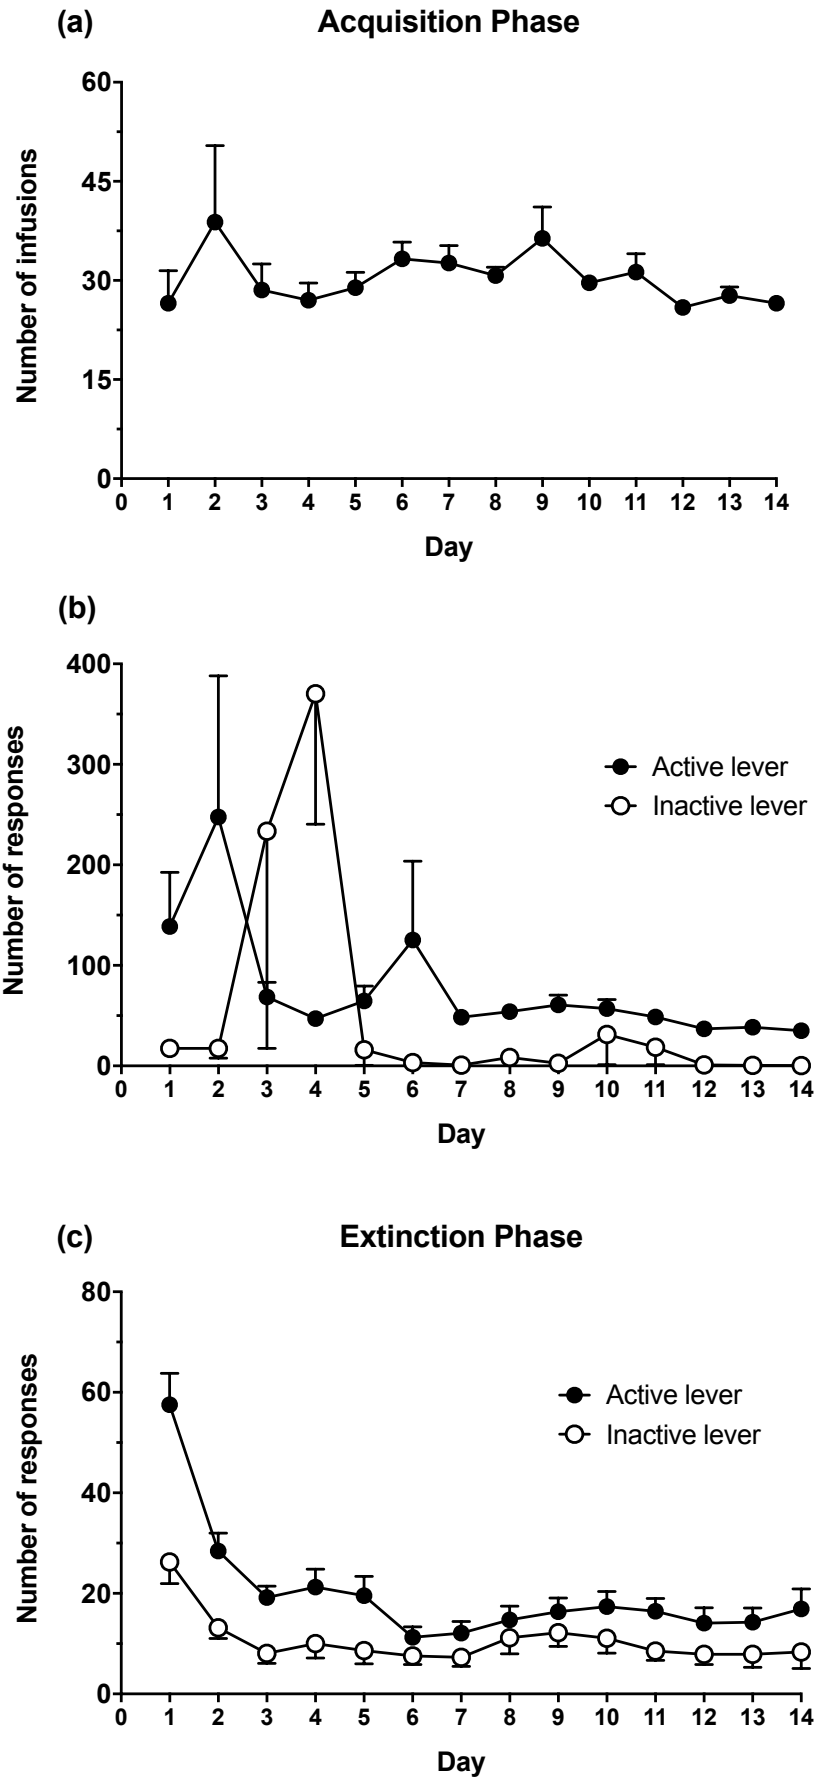

**Figure S2. MDPV self-administration performance across the acquisition and extinction phases in Experiment 2.** Number of MDPV infusions (a) and active and inactive lever responses (b) are shown across the 14 days of acquisition training. Number of active and inactive lever responses across the 14 days of extinction training (c) are also presented. Data are shown as mean  $\pm$  S.E.M. ( $n = 11$ ).

### Supporting Information: Figure S3

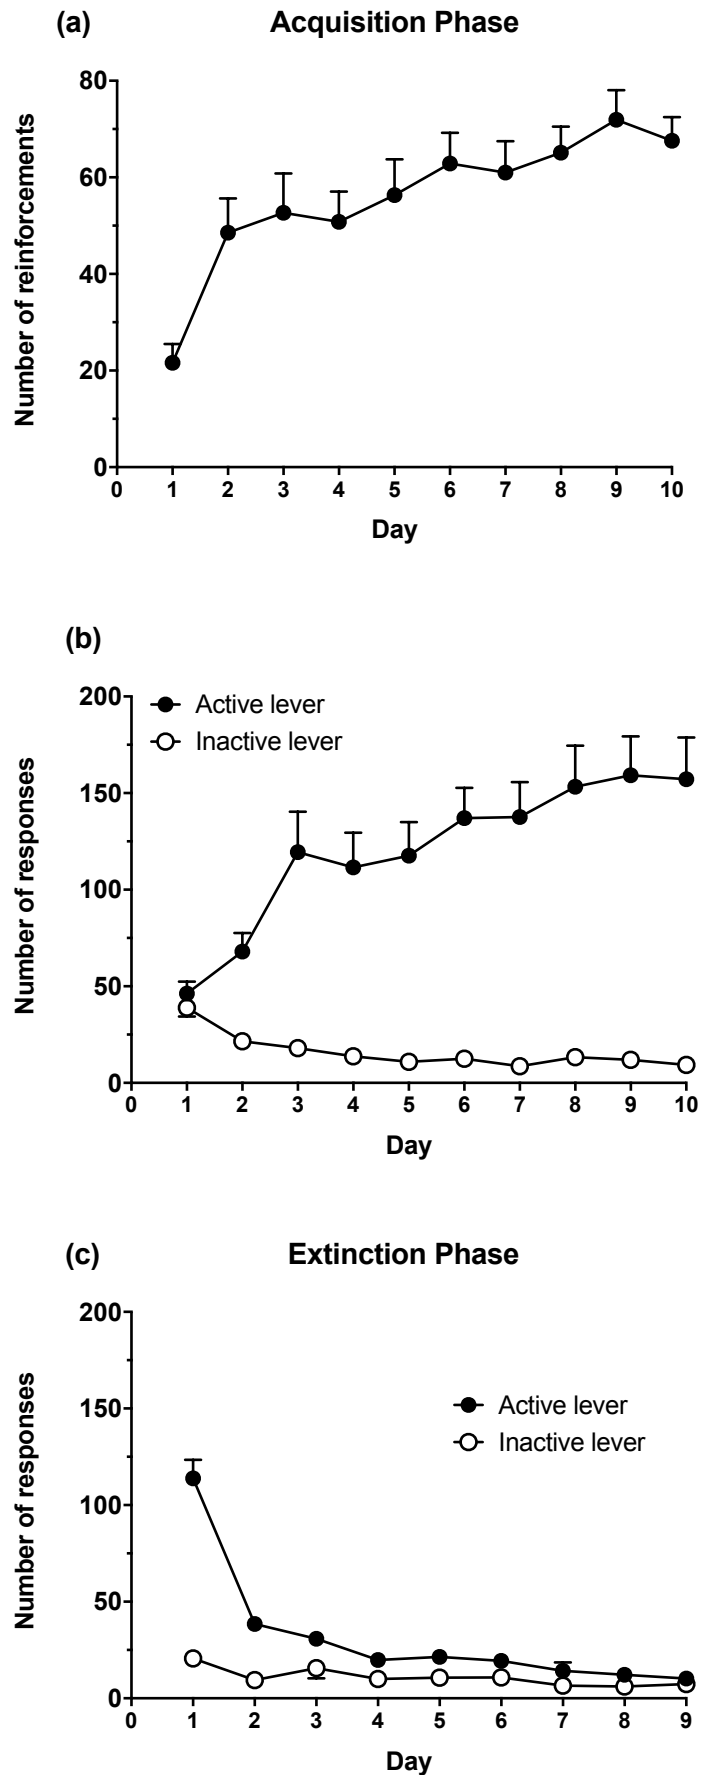

**Figure S3. Sucrose self-administration performance across the acquisition and extinction phases in Experiment 3.** Number of sucrose reinforcements (a) and active and inactive lever responses (b) are shown across the 10 days of acquisition training. Number of active and inactive lever responses across the 9 days of extinction training (c) are also presented. Data are shown as mean  $\pm$  S.E.M. ( $n = 15$ ).
